# Supplementary material
Source: Springer Nature journal article supplement (https://www.springermedizin.de/resource/supplementary/12947_2011_436_MOESM3_ESM.pdf/9555762)

# Carotid intima-media thickness for the CT, HNCD and HCD groups

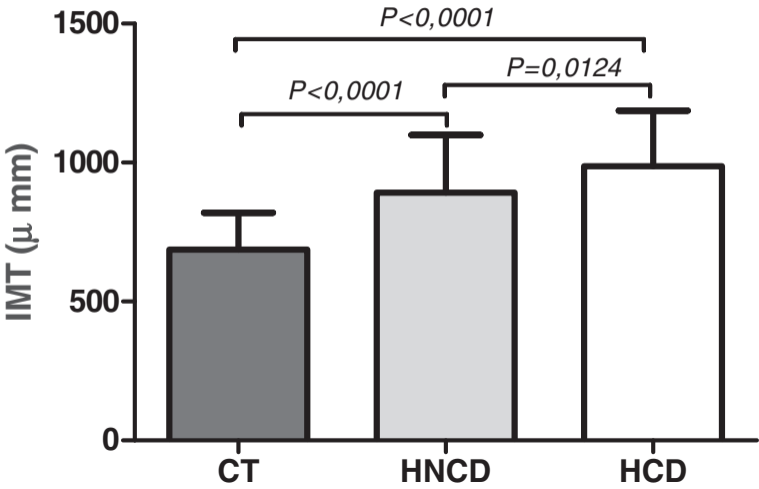

Supplement: MOESM3 [file 9555762]
